# Supplementary material for: Construction and first applications of a global cost of fishing database
Source: Oxford University Press journal article supplement (doi:10.1093/icesjms/fsr121), 2011-08-08
Supplement: fsr121supp.docx [file fsr121supp.docx]

**Supplementary material: ICES Journal of Marine Science, 68**

**Construction and first applications of a global cost of fishing database**

# Vicky W. Y. Lam, Ussif Rashid Sumaila, Andrew Dyck, Daniel Pauly,

# and Reg Watson

**The progressive refinement process**

After filling the database with secondary data where these were available, a realistic and quick estimation of fishing cost data was obtained for the whole world using a progressive refinement process of three major steps. To provide all combinations of gear type and country with an initial estimate, we first calculated the average cost values based on all the raw data collected, disregarding gear type and country:

|  | (S1) |
| --- | --- |

where is the average cost data (US$ per tonne), *ci* the raw fishing cost ($ per tonne) for each country and gear combination *i*, and *hi* is the catch (t) of each country and gear combination *i.*

It was then assumed that vessels with the same gear type have similar fishing costs regardless of their FAO region. With this assumption, if a fishing gear type in an FAO region did not have any cost data from any source, then it can be assigned a more-specific estimate from the average costs of the same gear type of all other FAO regions combined. To obtain this estimate, the average cost of each gear type in each region was computed, then the average cost ratio between two regions,, calculated:

|  | (S2) |
| --- | --- |

where is the average cost in region *i*, and is the average cost in region *k*. The weighted average cost for gear type *j* in region *i*, , can be calculated from other regions:

|  | (S3) |
| --- | --- |

where c*jk* is the average cost per tonne of catch by gear type *j* in region *k*, *hjk* the catch of gear type *j* in region *k*, *Rik* the cost ratio of region *i* to region *k*, and *n* is the total number of regions with cost for gear type *j*. For example, the observed data for the fuel cost of a dredge in all countries in Africa is not available in this version of the database. However, dredges of countries in both Europe and North America have information on fuel cost, with an average of $313 and $583 per tonne of catch in 2005, respectively. The fuel cost ratio between Africa and Europe is 1.28, and that between Africa and North America is 0.57. In 2005, the total landings by dredge in Europe and North America were 0.1 and 0.6 million tonnes, respectively. By applying Equation (S3), the average fuel cost of dredge in the countries in Africa is estimated to be $335 per tonne of catch.

Finally, we assumed that countries with the same gear type have similar fishing costs within the same region, so a more-specific estimate can be assigned to a particular gear type in a country without any data from secondary sources. The last step is to obtain the weighted average costs of each gear type in each FAO region:

|  | (S4) |
| --- | --- |

where *cji* is the weighted average cost of gear type *j* in region *i*, *cjm* the average cost of gear type *j* in country *m*, *hjm* the catch of gear type *j* in country *m*, and *n* is the total number of countries with cost for gear type *j* in region *i*. Then, this value was assigned to the same gear type of all countries in the same region where raw data were not available. At this point, every gear type in each fishing country should have been assigned a more-specific cost data if raw data were not available. For example, the information on fuel cost of bottom trawl is only available in three countries including Argentina, Brazil and Perú in the South, Central America and Carribbean region, and their average fuel costs are $165, $186, and $250 per tonne of catch, respectively. The weighted average fuel cost from these three countries is therefore $167 per tonne, and this value is used to assign the fuel cost of other countries that do not have any fuel cost information from secondary sources, in the same region.
